# Supplementary material
Source: ML conference proceedings conference paper supplement (https://proceedings.mlr.press/v216/zuo23a.html)
Supplement: Supplementary file 1 [file zuo23a-supp.pdf]

---

## Regularized Online DR-Submodular Optimization (Supplementary Material)

---

Pengyu Zuo<sup>1</sup>

Yao Wang<sup>1</sup>

Shaojie Tang<sup>2</sup>

<sup>1</sup>Xi'an Jiaotong University, Xi'an, China

<sup>2</sup>The University of Texas at Dallas, Richardson, USA

zpyqwq@gmail.com, yao.s.wang@gmail.com, shaojie.tang@utdallas.edu

### A PROOF OF LEMMA 2

*Proof.* The proof of Lemma 2 can be derived from [Zhang et al., 2022]. For the readers' convenience, we also give a proof here. First, we have a inequality about  $\langle \mathbf{x}, \nabla F(\mathbf{x}) \rangle$ , that is,

$$\begin{aligned}
 \langle \mathbf{x}, \nabla F(\mathbf{x}) \rangle &= \int_0^1 e^{z-1} \langle \mathbf{x}, \nabla f(z * \mathbf{x}) \rangle dz \\
 &= \int_0^1 e^{z-1} df(z * \mathbf{x}) \\
 &= e^{z-1} f(z * \mathbf{x}) \Big|_{z=0}^{z=1} - \int_0^1 f(z * \mathbf{x}) e^{z-1} dz \\
 &\leq f(\mathbf{x}) - \int_0^1 f(z * \mathbf{x}) e^{z-1} dz.
 \end{aligned} \tag{1}$$

Second, we also have an inequality about  $\langle \mathbf{y}, \nabla F(\mathbf{x}) \rangle$ , that is,

$$\begin{aligned}
 \langle \mathbf{y}, \nabla F(\mathbf{x}) \rangle &= \int_0^1 e^{z-1} \langle \mathbf{y}, \nabla f(z * \mathbf{x}) \rangle dz \\
 &\geq \int_0^1 e^{z-1} \langle \mathbf{y} \vee (z * \mathbf{x}) - z * \mathbf{x}, \nabla f(z * \mathbf{x}) \rangle dz \\
 &\geq \int_0^1 e^{z-1} (f(\mathbf{y} \vee (z * \mathbf{x})) - f(z * \mathbf{x})) dz \\
 &\geq (1 - \frac{1}{e}) f(\mathbf{y}) - \int_0^1 f(z * \mathbf{x}) e^{z-1} dz
 \end{aligned} \tag{2}$$

where the first inequality holds because  $\mathbf{y} \geq \mathbf{y} \vee (z * \mathbf{x}) - z * \mathbf{x} \geq \mathbf{0}$  and  $\nabla f(z * \mathbf{x}) \geq \mathbf{0}$ ; the second one comes from the property that DR-submodular function is concave along any non-negative and non-positive direction Bian et al. [2017]; the final one comes from  $f(\mathbf{y} \vee (z * \mathbf{x})) \geq f(\mathbf{y})$ .

Finally, putting the inequality (1) and inequality (2) together, we have

$$\begin{aligned}
 \langle \mathbf{y} - \mathbf{x}, \nabla F(\mathbf{x}) \rangle &\geq (1 - \frac{1}{e}) f(\mathbf{y}) - \int_0^1 f(z * \mathbf{x}) e^{z-1} dz - \left( f(\mathbf{x}) - \int_0^1 f(z * \mathbf{x}) e^{z-1} dz \right) \\
 &\geq (1 - \frac{1}{e}) f(\mathbf{y}) - f(\mathbf{x}).
 \end{aligned}$$

□

## B PROOF OF THEOREM 1

*Proof.* Let  $\tau$  be the stopping time of Algorithm 1, i.e. when  $B_\tau < 1$ . We will complete the proof in three steps.

**Step 1:** We will bound the regret of  $\mathcal{L}_t^P$  up to  $\tau$ .

Let  $\mathbf{x}_*^P = \arg \sup_{\mathbf{x} \in \mathcal{P}} \sum_{t=1}^{\tau} \mathcal{L}_t^P(\mathbf{x})$ . We define  $\nabla_t = \nabla \mathcal{L}_t^P(\mathbf{x}_t)$ , and  $\tilde{\nabla}_t = \nabla \tilde{\mathcal{L}}_t^P(\mathbf{x}_t) = \nabla (F(\mathbf{x}_t) + r(\mathbf{x}) - \langle \lambda_t, c_t(\mathbf{x}) \rangle)$ . By the definition of  $\mathbf{x}_{t+1}$  and properties of the projection operator for a convex set, we have

$$\begin{aligned} \|\mathbf{x}_{t+1} - \mathbf{x}_*^P\|^2 &= \left\| \Pi_{\mathcal{P}} \left( \mathbf{x}_t + \eta_t \tilde{\nabla}_t \right) - \mathbf{x}_*^P \right\|^2 \leq \left\| \mathbf{x}_t + \eta_t \tilde{\nabla}_t - \mathbf{x}_*^P \right\|^2 \\ &\leq \|\mathbf{x}_t - \mathbf{x}_*^P\|^2 + \eta_t^2 \|\tilde{\nabla}_t\|^2 - 2\eta_t \tilde{\nabla}_t^\top (\mathbf{x}_*^P - \mathbf{x}_t). \end{aligned}$$

Therefore we further have

$$\begin{aligned} \tilde{\nabla}_t^\top (\mathbf{x}_*^P - \mathbf{x}_t) &\leq \frac{\|\mathbf{x}_t - \mathbf{x}_*^P\|^2 - \|\mathbf{x}_{t+1} - \mathbf{x}_*^P\|^2 + \eta_t^2 \|\tilde{\nabla}_t\|^2}{2\eta_t} \\ &\leq \frac{\|\mathbf{x}_t - \mathbf{x}_*^P\|^2 - \|\mathbf{x}_{t+1} - \mathbf{x}_*^P\|^2}{2\eta_t} + \frac{\eta_t G^2}{2}, \end{aligned}$$

where  $G = \sup_t \|\tilde{\nabla}_t\|$ .

If we define  $\frac{1}{\eta_0} \triangleq 0$  and in light of Lemma 2, it can be deduced that

$$\begin{aligned} &\sum_{t=1}^{\tau} \left(1 - \frac{1}{e}\right) f_t(\mathbf{x}_*^P) + r(\mathbf{x}_*^P) - \lambda_t c_t(\mathbf{x}_*^P) - f_t(\mathbf{x}_t) - r(\mathbf{x}_t) + \lambda_t c_t(\mathbf{x}_t) \\ &\leq \sum_{t=1}^{\tau} \langle \nabla F(\mathbf{x}_t), \mathbf{x}_*^P - \mathbf{x}_t \rangle + \langle \nabla (r(\mathbf{x}_t) - \lambda_t c_t(\mathbf{x})), \mathbf{x}_*^P - \mathbf{x}_t \rangle \\ &= \sum_{t=1}^{\tau} \langle \tilde{\nabla}_t, \mathbf{x}_*^P - \mathbf{x}_t \rangle \\ &\leq \frac{1}{2\eta_t} \sum_{t=1}^{\tau} \|\mathbf{x}_t - \mathbf{x}_*^P\|^2 - \|\mathbf{x}_{t+1} - \mathbf{x}_*^P\|^2 + \frac{G^2}{2} \sum_{t=1}^{\tau} \eta_t \\ &\leq \frac{1}{2} \left( \sum_{t=1}^{\tau} \|\mathbf{x}_t - \mathbf{x}_*^P\|^2 \left( \frac{1}{\eta_t} - \frac{1}{\eta_{t-1}} \right) \right) + \frac{G^2}{2} \sum_{t=1}^{\tau} \eta_t \\ &\leq \frac{D^2}{2\eta_\tau} + \frac{G^2}{2} \sum_{t=1}^{\tau} \eta_t \\ &\leq O(\sqrt{\tau}), \end{aligned}$$

where  $D = \sup_{\mathbf{x}, \mathbf{y} \in \mathcal{P}} \|\mathbf{x} - \mathbf{y}\|$ .

**Step 2:** We will bound the regret of  $\mathcal{L}_t^D$  up to  $\tau$ .

Because  $\mathcal{L}_t^D$  is a linear function, using the online gradient descent, we have  $\sup_{\lambda \in \mathcal{D}} \sum_{t=1}^{\tau} (\mathcal{L}_t^D(\lambda) - \mathcal{L}_t^D(\lambda_t)) \leq O(\sqrt{\tau})$  for any  $\lambda$ .

**Step 3:** Using the results of Steps 1 and 2, we can complete the proof.

From Step 1, we have

$$\sup_{\mathbf{x} \in \mathcal{P}} \sum_{t=1}^{\tau} \left( \left(1 - \frac{1}{e}\right) f_t(\mathbf{x}) + r(\mathbf{x}) - \langle \lambda_t, c_t(\mathbf{x}) \rangle - f_t(\mathbf{x}_t) - r(\mathbf{x}_t) + \langle \lambda_t, c_t(\mathbf{x}_t) \rangle \right) \leq O(\sqrt{\tau}).$$

Then, by rearranging,

$$\sum_{t=1}^{\tau} f_t(\mathbf{x}_t) + r(\mathbf{x}_t) \geq \sup_{x \in \mathcal{P}} \sum_{t=1}^{\tau} \left( \left(1 - \frac{1}{e}\right) f_t(\mathbf{x}) + r(\mathbf{x}) - T \langle \lambda_t, c_t(\mathbf{x}) \rangle + \langle \lambda_t, c_t(\mathbf{x}_t) \rangle \right) - O(\sqrt{\tau}).$$

From Step 2,  $\forall \lambda$  we have  $\sum_{t=1}^{\tau} (\mathcal{L}_t^D(\lambda) - \mathcal{L}_t^P(\lambda_t)) \leq O(\sqrt{\tau})$ . Then, by the definition of  $\mathcal{L}_t^D$ ,

$$\sum_{t=1}^{\tau} \langle \lambda_t, c_t(\mathbf{x}_t) \rangle \geq \sum_{t=1}^{\tau} (\langle \lambda_t, \rho \rangle - \langle \lambda, \rho \rangle + \langle \lambda, c_t(\mathbf{x}_t) \rangle) - O(\sqrt{\tau}).$$

Therefore,

$$\sum_{t=1}^{\tau} f_t(\mathbf{x}_t) + r(\mathbf{x}_t) \geq -O(\sqrt{\tau}) + \sup_{x \in \mathcal{P}} \sum_{t=1}^{\tau} \left( \left(1 - \frac{1}{e}\right) f_t(\mathbf{x}) + r(\mathbf{x}) + \langle \lambda_t, \rho - c_t(\mathbf{x}) \rangle - \langle \lambda, \rho - c_t(\mathbf{x}_t) \rangle \right). \quad (3)$$

Next, we provide a lower bound on the following term.

$$\mathbb{A} = \sup_{x \in \mathcal{P}} \sum_{t=1}^{\tau} \left( \left(1 - \frac{1}{e}\right) f_t(\mathbf{x}) + r(\mathbf{x}) + \langle \lambda_t, \rho - c_t(\mathbf{x}) \rangle \right).$$

Let  $\text{APO}_{\tau}^* = \sup_{x \in \mathcal{P}} \sum_{t=1}^{\tau} \left( \left(1 - \frac{1}{e}\right) f_t(\mathbf{x}) + r(\mathbf{x}) \right)$  and  $\mathbf{x}^* = \arg \sup_{x \in \mathcal{P}} \sum_{t=1}^{\tau} \left( \left(1 - \frac{1}{e}\right) f_t(\mathbf{x}) + r(\mathbf{x}) \right)$ .  $\text{APO}_{\tau}^*$  represents the  $(1 - \frac{1}{e}, 1)$  approximate optimal value without constraints. We shall show that

$$\mathbb{A} \geq \rho \text{APO}_{\tau}^*. \quad (4)$$

To do so, we consider two cases. First, if  $\sum_{t=1}^{\tau} (1 - \frac{1}{e}) f_t(\mathbf{x}^*) \geq \sum_{t=1}^{\tau} \langle \lambda_t, c_t(\mathbf{x}^*) \rangle$ , then the value of the function for  $\mathbf{x}^*$  is at least

$$\begin{aligned} \mathbb{A} &\geq \sup_{x \in \mathcal{P}} \sum_{t=1}^{\tau} \left( \left(1 - \frac{1}{e}\right) f_t(\mathbf{x}) + r(\mathbf{x}) + \langle \lambda_t, \rho - c_t(\mathbf{x}) \rangle \right) \\ &\geq \sum_{t=1}^{\tau} \left( \left(1 - \frac{1}{e}\right) f_t(\mathbf{x}^*) + r(\mathbf{x}^*) + \langle \lambda_t, \rho - c_t(\mathbf{x}^*) \rangle \right) \\ &\geq \sum_{t=1}^{\tau} \left( \left(1 - \frac{1}{e}\right) f_t(\mathbf{x}^*) + r(\mathbf{x}^*) + \langle \lambda_t, \rho \cdot c_t(\mathbf{x}^*) - c_t(\mathbf{x}^*) \rangle \right) \\ &\geq \sum_{t=1}^{\tau} \left( 1 - \frac{1}{e} \right) f_t(\mathbf{x}^*) + r(\mathbf{x}^*) + (1 - \rho) \sum_{t=1}^{\tau} \langle \lambda_t, c_t(\mathbf{x}^*) \rangle \\ &\geq \rho \sum_{t=1}^{\tau} \left( 1 - \frac{1}{e} \right) f_t(\mathbf{x}^*) + r(\mathbf{x}^*) = \rho \text{APO}_{\tau}^*, \end{aligned}$$

where the second inequality holds since  $c_t(\cdot) \in [0, 1]$ , for each  $t \in [T]$ . Otherwise, if  $\sum_{t=1}^{\tau} (1 - \frac{1}{e}) f_t(\mathbf{x}^*) < \sum_{t=1}^{\tau} \langle \lambda_t, c_t(\mathbf{x}^*) \rangle$ , we have that

$$\begin{aligned} \mathbb{A} &\geq \sum_{t=1}^{\tau} \langle \lambda_t, \rho \rangle \geq \sum_{t=1}^{\tau} \langle \lambda_t, \rho \cdot c_t(\mathbf{x}^*) \rangle \\ &\geq \rho \sum_{t=1}^{\tau} \left( 1 - \frac{1}{e} \right) f_t(\mathbf{x}^*) + r(\mathbf{x}^*) = \rho \text{APO}_{\tau}^*. \end{aligned}$$

Combining inequality (3) and inequality (4), we get

$$\sum_{t=1}^{\tau} (f_t(\mathbf{x}_t) + r(\mathbf{x}_t) - \langle \lambda_t, c_t(\mathbf{x}_t) \rangle) \geq -O(\sqrt{\tau}) + \rho \text{APO}_{\tau}^* - \tau \langle \lambda, \rho \rangle.$$

In particular, we have

$$\rho \text{APO}_{\tau}^* \geq \rho \text{APO}_{\tau} \geq \rho (\text{APO}_{\tau} - T + \tau),$$

where,  $\text{APO}_\tau$  is the  $(1 - \frac{1}{e}, 1)$  approximate optimal reward with constraints. By definition,  $\text{REW} = \sum_{t=1}^{\tau} f_t(\mathbf{x}_t) + r(\mathbf{x}_t)$ . Then,

$$\begin{aligned} \text{REW} &= \sum_{t=1}^{\tau} f_t(\mathbf{x}_t) + r(\mathbf{x}_t) \geq -O(\sqrt{\tau}) + \rho \text{APO}_\tau^* - \sum_{t=1}^{\tau} \langle \lambda, \rho - c_t(\mathbf{x}_t) \rangle \\ &\geq -O(\sqrt{\tau}) + \rho(\text{APO}_\tau - T + \tau) - \sum_{t=1}^{\tau} \langle \lambda, \rho - c_t(\mathbf{x}_t) \rangle. \end{aligned}$$

If  $\tau = T$ , in order to get the result, it is enough to set  $\lambda = 0$ , and to substitute the above expression in the definition of regret. Otherwise, if  $\tau < T$ , which means that

$$\sum_{t=1}^{\tau} c_t(\mathbf{x}_t) + 1 \geq \rho T,$$

where, in our setting, the largest possible cost is 1. Then, we set  $\lambda = 1/\rho$  and thus,

$$\sum_{t=1}^{\tau} \langle \lambda, \rho - c_t(\mathbf{x}_t) \rangle = 1/\rho \sum_{t=1}^{\tau} (\rho - c_t(\mathbf{x}_t)) \leq \tau - T + 1/\rho.$$

Then, by substituting the above expression

$$\text{REW} \geq -O(\sqrt{\tau}) + \rho(\text{APO}_\tau - T + \tau) - (\tau - T) - 1/\rho.$$

Finally, we have

$$\begin{aligned} \rho(1 - \frac{1}{e}, 1)\text{OPT} - \text{REW} &\leq \rho \text{APO}_\tau - \text{REW} \leq O(\sqrt{\tau}) + (T - \tau)(\rho - 1) + 1/\rho \\ &\leq O(\sqrt{\tau}) + 1/\rho = O(\sqrt{T}). \end{aligned}$$

□

## C PROOF OF PROPOSITION 1

*Proof.* We use induction to prove this proposition. For the case when  $n = 2$ , let  $\mathbf{x}_1 \leq \mathbf{x}_2$ ,  $\mathbf{z} = \lambda \mathbf{x}_1 + (1 - \lambda) \mathbf{x}_2$ , we have  $\mathbf{x}_1 - \mathbf{z} \leq \mathbf{0}$ , and  $\mathbf{x}_2 - \mathbf{z} \geq \mathbf{0}$ . Using the property that DR-submodular function is concave along any non-negative and non-positive direction Bian et al. [2017], we get

$$\begin{aligned} f(\mathbf{x}_1) &\leq f(\mathbf{z}) + \nabla f(\mathbf{z})(\mathbf{x}_1 - \mathbf{z}), \\ f(\mathbf{x}_2) &\leq f(\mathbf{z}) + \nabla f(\mathbf{z})(\mathbf{x}_2 - \mathbf{z}). \end{aligned}$$

Multiplying the first inequality by  $\lambda$ , the second equation by  $1 - \lambda$ , and then adding the two inequalities together, we get the result for  $n = 2$ .

To show that this is true for all natural numbers, we proceed by induction. Assume the proposition is true for some  $n$  and then,

$$f\left(\sum_{i=1}^{n+1} \lambda_i \mathbf{x}_i\right) = f\left(\lambda_1 \mathbf{x}_1 + \sum_{i=2}^{n+1} \lambda_i \mathbf{x}_i\right) = f\left(\lambda_1 \mathbf{x}_1 + (1 - \lambda_1) \frac{1}{1 - \lambda_1} \sum_{i=2}^{n+1} \lambda_i \mathbf{x}_i\right)$$

because  $\mathbf{x}_1 \leq \mathbf{x}_i, \forall i = 2, \dots, n + 1$ , and  $\sum_{i=2}^{n+1} \frac{\lambda_i}{1 - \lambda_1} = 1$ , we get  $\mathbf{x}_1 \leq \frac{1}{1 - \lambda_1} \sum_{i=2}^{n+1} \lambda_i \mathbf{x}_i$ , finally we have

$$\begin{aligned} f\left(\sum_{i=1}^{n+1} \lambda_i \mathbf{x}_i\right) &\geq \lambda_1 f(\mathbf{x}_1) + (1 - \lambda_1) f\left(\frac{1}{1 - \lambda_1} \sum_{i=2}^{n+1} \lambda_i \mathbf{x}_i\right) \\ &= \lambda_1 f(\mathbf{x}_1) + (1 - \lambda_1) f\left(\sum_{i=2}^{n+1} \frac{\lambda_i}{1 - \lambda_1} \mathbf{x}_i\right) \\ &\geq \lambda_1 f(\mathbf{x}_1) + (1 - \lambda_1) \sum_{i=2}^{n+1} \frac{\lambda_i}{1 - \lambda_1} f(\mathbf{x}_i) \\ &= \sum_{i=1}^{n+1} \lambda_i f(\mathbf{x}_i). \end{aligned}$$

□

## D PROOF OF THEOREM 2

*Proof.* Let  $\tau$  be the stopping time of Algorithm 2, i.e. when  $B_\tau < 1$ . First, we will bound the regret up to  $\tau$ . Let  $\mathbf{x}^*$  be the best fixed action for Problem (2) defined in the main paper. Because  $c_t(\mathbf{x}_t) \leq 1$ , we have  $\tau \geq \rho T$ . Using the  $L$ -smoothness of  $f$  and  $r$  and the update rule of Algorithm 2, we have

$$\begin{aligned}
f(\mathbf{x}_{t+1}) + r(\mathbf{x}_{t+1}) &\stackrel{(a)}{\geq} f(\mathbf{x}_t) + r(\mathbf{x}_t) + \frac{1}{T} \langle \mathbf{v}_t, \nabla f(\mathbf{x}_t) + \nabla r(\mathbf{x}_t) \rangle - \frac{L}{2T^2} \|\mathbf{v}_t\|^2 \\
&\geq f(\mathbf{x}_t) + r(\mathbf{x}_t) + \frac{1}{T} \langle \mathbf{v}_t, \mathbf{d}_t + \nabla r(\mathbf{x}_t) \rangle + \frac{1}{T} \langle \mathbf{v}_t, \nabla f(\mathbf{x}_t) - \mathbf{d}_t \rangle - \frac{LD^2}{2T^2} \\
&\stackrel{(b)}{\geq} f(\mathbf{x}_t) + r(\mathbf{x}_t) + \frac{1}{T} \langle \mathbf{x}^*, \mathbf{d}_t + \nabla r(\mathbf{x}_t) \rangle + \frac{1}{T} \langle \mathbf{v}_t, \nabla f(\mathbf{x}_t) - \mathbf{d}_t \rangle - \frac{LD^2}{2T^2} \\
&= f(\mathbf{x}_t) + r(\mathbf{x}_t) + \frac{1}{T} \langle \mathbf{x}^*, \nabla f(\mathbf{x}_t) + \nabla r(\mathbf{x}_t) \rangle + \frac{1}{T} \langle \mathbf{v}_t - \mathbf{x}^*, \nabla f(\mathbf{x}_t) - \mathbf{d}_t \rangle \\
&\quad - \frac{LD^2}{2T^2} \\
&\stackrel{(c)}{\geq} f(\mathbf{x}_t) + r(\mathbf{x}_t) + \frac{1}{T} \langle (\mathbf{x}^* - \mathbf{x}_t) \vee 0, \nabla f(\mathbf{x}_t) + \nabla r(\mathbf{x}_t) \rangle \\
&\quad + \frac{1}{T} \langle \mathbf{v}_t - \mathbf{x}^*, \nabla f(\mathbf{x}_t) - \mathbf{d}_t \rangle - \frac{LD^2}{2T^2} \\
&\stackrel{(d)}{\geq} f(\mathbf{x}_t) + r(\mathbf{x}_t) + \frac{1}{T} (f(\mathbf{x}^* \vee \mathbf{x}_t) + r(\mathbf{x}^* \vee \mathbf{x}_t)) - \frac{1}{T} (f(\mathbf{x}_t) + r(\mathbf{x}_t)) + \\
&\quad \frac{1}{T} \langle \mathbf{v}_t - \mathbf{x}^*, \nabla f(\mathbf{x}_t) - \mathbf{d}_t \rangle - \frac{LD^2}{2T^2} \\
&\stackrel{(e)}{\geq} f(\mathbf{x}_t) + r(\mathbf{x}_t) + \frac{1}{T} (f(\mathbf{x}^*) + r(\mathbf{x}^*)) - \frac{1}{T} (f(\mathbf{x}_t) + r(\mathbf{x}_t)) + \\
&\quad \frac{1}{T} \langle \mathbf{v}_t - \mathbf{x}^*, \nabla f(\mathbf{x}_t) - \mathbf{d}_t \rangle - \frac{LD^2}{2T^2}
\end{aligned}$$

where  $D = \sup_{\mathbf{x}, \mathbf{y} \in \mathcal{P}} \|\mathbf{x} - \mathbf{y}\|$ . The inequality (a) comes from the  $L$ -smoothness of  $f$  and  $r$ , inequality (b) holds because the update rule of Algorithm 2, (c) and (e) are due to the monotonicity of  $f$ , and (d) comes from the property that DR-submodular function is concave along any non-negative and non-positive direction. Defining  $\epsilon_t := \mathbf{d}_t - \nabla f(\mathbf{x}_t)$  and rearranging the term in the above inequality, we have

$$f(\mathbf{x}^*) + r(\mathbf{x}^*) - f(\mathbf{x}_{t+1}) - r(\mathbf{x}_{t+1}) \leq (1 - \frac{1}{T})(f(\mathbf{x}^*) + r(\mathbf{x}^*) - f(\mathbf{x}_t) - r(\mathbf{x}_t)) + \frac{D}{T} \|\epsilon_t\| + \frac{LD^2}{2T^2}.$$

Applying the above inequality recursively, we further have

$$f(\mathbf{x}^*) + r(\mathbf{x}^*) - f(\mathbf{x}_{t+1}) - r(\mathbf{x}_{t+1}) \leq (1 - \frac{1}{T})^t (f(\mathbf{x}^*) + r(\mathbf{x}^*) - f(\mathbf{x}_1) - r(\mathbf{x}_1)) + \frac{D}{T} \sum_{s=1}^t \|\epsilon_s\| + \frac{LD^2}{2T}.$$

Using the above inequality and the fact that  $\sum_{t=1}^{\tau-1} (1 - \frac{1}{T})^t \leq \sum_{t=1}^{\tau-1} e^{-t/T} \leq \tau(e^{-1/T} - 1/e^\rho) \leq \tau(1 - 1/e^\rho)$ , we get the  $(\frac{1}{e^\rho}, \frac{1}{e^\rho})$ - $\mathcal{SR}_\tau$  is bounded by  $\frac{\rho LD^2}{2} + \frac{D}{T} \sum_{t=1}^{\tau-1} \sum_{s=1}^t \epsilon_s$ . Thus, we get

$$\begin{aligned}
\epsilon_t &= \mathbf{d}_t - \nabla f(\mathbf{x}_t) \\
&= (1 - \eta_t) \epsilon_{t-1} + \eta_t (\nabla f_t(\mathbf{x}_t) - \nabla f(\mathbf{x}_t)) \\
&\quad + (1 - \eta_t) (\nabla f_t(\mathbf{x}_t) - \nabla f_t(\mathbf{x}_{t-1}) - (\nabla f(\mathbf{x}_t) - \nabla f(\mathbf{x}_{t-1}))).
\end{aligned}$$

Applying the above equality recursively, we obtain

$$\begin{aligned}
\epsilon_t &= \prod_{s=2}^{\tau} (1 - \eta_t) \epsilon_1 + \sum_{m=1}^t \prod_{s=m}^t (1 - \eta_t) (\nabla f_m(\mathbf{x}_m) - \nabla f_m(\mathbf{x}_{m-1}) - (\nabla f(\mathbf{x}_m) - \nabla f(\mathbf{x}_{m-1}))) \\
&\quad + \sum_{m=2}^t \eta_t \prod_{m+1}^t (1 - \eta_t) (\nabla f_m(\mathbf{x}_m) - \nabla f(\mathbf{x}_m)).
\end{aligned}$$

Let  $\epsilon_1 = \sum_{m=1}^t \xi_{t,m}$ , where  $\xi_{t,1} = \prod_{s=2}^t (1 - \eta_t) \epsilon_1$  and  $\xi_{t,m} = \prod_{s=m}^t (1 - \eta_t) (\nabla f_m(\mathbf{x}_m) - \nabla f_m(\mathbf{x}_{m-1}) - (\nabla f(\mathbf{x}_m) - \nabla f(\mathbf{x}_{m-1}))) + \eta_t \prod_{m+1}^t (1 - \eta_t) (\nabla f_m(\mathbf{x}_m) - \nabla f(\mathbf{x}_m))$  for  $m > 1$ . Let  $\mathcal{F}_t$  be the  $\sigma$ -field generated by  $\{f_s\}_{s=1}^{m-1}$ . Clearly,  $\mathbb{E}[\xi_{t,1}] = 0$ . Also, for  $m > 1$ , we have

$$\begin{aligned} \mathbb{E}[\xi_{t,m} | \mathcal{F}_m] &= \prod_{s=m}^t (1 - \eta_t) (\nabla f(\mathbf{x}_m) - \nabla f(\mathbf{x}_{m-1}) - (\nabla f(\mathbf{x}_m) - \nabla f(\mathbf{x}_{m-1}))) \\ &\quad + \eta_t \prod_{m+1}^t (1 - \eta_t) (\nabla f(\mathbf{x}_m) - \nabla f(\mathbf{x}_m)) \\ &= 0. \end{aligned}$$

Therefore, for all  $t \in \tau$ ,  $\{\xi_{t,m}\}_{m=1}^t$  is a martingale difference sequence. For any  $m \in [t]$ , we can write

$$\prod_{s=m}^t (1 - \eta_t) = \prod_{s=m}^t \left(1 - \frac{1}{s+1}\right) = \prod_{s=m}^t \left(\frac{s}{s+1}\right) = \frac{m}{t+1}.$$

Thus we have  $\|\xi_{t,1}\| = \frac{2}{t+1} \|\nabla f_1(\mathbf{x}_1) - \nabla f(\mathbf{x}_1)\| \leq \frac{2\sigma}{t+1}$ . For  $m > 1$ , we have

$$\begin{aligned} \|\xi_{t,m}\| &\leq \prod_{s=m}^t (1 - \eta_t) (\|\nabla f(\mathbf{x}_m) - \nabla f(\mathbf{x}_{m-1})\| + \|(\nabla f(\mathbf{x}_m) - \nabla f(\mathbf{x}_{m-1}))\|) \\ &\quad + \eta_t \prod_{m+1}^t (1 - \eta_t) \|\nabla f(\mathbf{x}_m) - \nabla f(\mathbf{x}_m)\| \\ &\leq \frac{2Lm}{t+1} \|\mathbf{x}_m - \mathbf{x}_{m-1}\| + \frac{\sigma}{t+1} \\ &\leq \frac{2LDm/\tau + m}{t+1} \\ &\leq \frac{2LD + m}{t+1}. \end{aligned}$$

Using the concentration inequality for vector-valued martingales, we have

$$\mathbb{P}(\|\epsilon_t\| \geq \lambda_t) \leq 2 \exp\left(-\frac{\lambda_t^2}{\left(\frac{2\sigma}{t+1}\right)^2 + (t-1)\left(\frac{2LD+m}{t+1}\right)^2}\right) \leq 2 \exp\left(-\frac{\lambda_t^2(t+1)}{(2LD+2\sigma)^2}\right).$$

Therefore, we can get the expected regret bound of the algorithm:

$$\begin{aligned} \mathbb{E}\|\epsilon_t\| &= \int_{\lambda=0}^{\infty} \mathbb{P}(\|\epsilon_t\| \geq \lambda) d\lambda \\ &\leq \int_{\lambda=0}^{\infty} 2 \exp\left(-\frac{\lambda_t^2(t+1)}{(2LD+2\sigma)^2}\right) d\lambda \\ &= \int_{\lambda=0}^{\infty} 2 \exp(-x^2) \frac{2LD+2\sigma}{\sqrt{t+1}} dx \\ &= \frac{2\sqrt{\pi}(LD+\sigma)}{\sqrt{t+1}}. \end{aligned}$$

As a consequence, the expected regret bound is  $O(\sqrt{\tau})$ .

Now, we get the regret up to  $\tau$ . Let  $\text{REW}_\tau$  be the reward that we get, and  $\text{OPT}_\tau$  be the optimal reward till  $\tau$ . So we have:

$$\mathbb{E}\left(\frac{1}{e^\rho} \text{OPT}_\tau - \text{REW}_\tau\right) \leq O(\sqrt{\tau}) = O(\sqrt{T}).$$

Because the  $f_t, c_t$  are sampled i.i.d from  $\mathcal{D}$  and  $\tau \geq \rho T$ , we get  $\mathbb{E}(\text{OPT}_\tau) \geq \rho \mathbb{E}(\text{OPT}_T)$ . Therefore,

$$\mathbb{E}\left(\frac{\rho}{e^\rho} \text{OPT}_T - \text{REW}_\tau\right) \leq \mathbb{E}\left(\frac{1}{e^\rho} \text{OPT}_\tau - \text{REW}_\tau\right) \leq O(\sqrt{T}).$$

□

## Deferences

- An Bian, Kfir Levy, Andreas Krause, and Joachim M Buhmann. Continuous dr-submodular maximization: Structure and algorithms. *Advances in Neural Information Processing Systems*, 30, 2017.
- Qixin Zhang, Zengde Deng, Zaiyi Chen, Haoyuan Hu, and Yu Yang. Stochastic continuous submodular maximization: Boosting via non-oblivious function. In *International Conference on Machine Learning*, pages 26116–26134. PMLR, 2022.
